# Supplementary material for: An SF1 affinity model to identify branch point sequences in human introns
Source: PubMed Central journal article supplement — Nucleic Acids Res. 2010 Nov 10;39(6):2344–56. doi: 10.1093/nar/gkq1046 (PMC3064769; doi:10.1093/nar/gkq1046), 2010-11-10
Supplement: supp_gkq1046_Pastuszak_et_al-revised_Suppl.pdf [file supp_gkq1046_Pastuszak_et_al-revised_Suppl.pdf]

**SUPPLEMENTARY DATA**  
**TABLES**

**Supplementary Table 1 – Introns Selected for Branch Point Mapping**

| <b>Gene</b>     | <b>PPT Score (bits)</b> | <b>Initial SF1 Binding Model Score (bits)</b> | <b>BP A - PPT Distance (bp)</b> | <b>Intron</b> |
|-----------------|-------------------------|-----------------------------------------------|---------------------------------|---------------|
| <i>PPS1</i>     | 11.528                  | 8.254                                         | 15                              | 6 of 6        |
| <i>HMGN3</i>    | 14.499                  | 8.254                                         | 14                              | 5 of 5        |
| <i>MSN</i>      | 11.734                  | 8.315                                         | 10                              | 11 of 12      |
| <i>SNRNPF</i>   | 6.803                   | 8.472                                         | 9                               | 2 of 3        |
| <i>CDC20</i>    | 7.566                   | 8.399                                         | 12                              | 8 of 10       |
| <i>ZMPSTE24</i> | 6.182                   | 8.187                                         | 14                              | 8 of 9        |
| <i>AP2M1</i>    | 4.227                   | 7.383                                         | 6                               | 11 of 11      |

Supplementary Table 2 – Sequences Assayed for SF1 Binding

| Sequence                    | Initial SF1 Binding Model Score (bits) | Initial SF1 Binding Model Rank | SF1 Affinity Model Score (bits) | SF1 Affinity Model Rank |
|-----------------------------|----------------------------------------|--------------------------------|---------------------------------|-------------------------|
| <b>Highest Scoring</b>      |                                        |                                |                                 |                         |
|                             |                                        | <b>Score Rank</b>              |                                 | <b>Score Rank</b>       |
| UACUAAC                     | 9.4952                                 | 1                              | 9.4055                          | 1                       |
| UACUGAC                     | 9.2321                                 | 2                              | 8.7037                          | 2                       |
| UAGUAAC                     | 8.0803                                 | 3                              | 5.8523                          | 37                      |
| UAGUGAC                     | 7.8172                                 | 4                              | 5.1505                          | 69                      |
| <u>UACUAAU</u>              | 7.4953                                 | 5                              | 7.4166                          | 9                       |
| CACUAAC                     | 7.4953                                 | 5                              | 7.4543                          | 8                       |
| GACUAAC                     | 7.4953                                 | 5                              | 8.2371                          | 3                       |
| UACUAAG                     | 7.4953                                 | 5                              | 5.8483                          | 38                      |
| <u>UGCUAAC</u>              | 7.3254                                 | 6                              | 8.194                           | 4                       |
| <u>CACUGAC</u>              | 7.2322                                 | 7                              | 6.7525                          | 16                      |
| <b>Very Low Scoring</b>     |                                        |                                |                                 |                         |
|                             |                                        | <b>Score Rank</b>              |                                 | <b>Score Rank</b>       |
| ACUACCA                     | -11.9028                               | 263                            | -8.7002                         | 13835                   |
| AUAACCA                     | -11.9028                               | 263                            | -7.9673                         | 13002                   |
| ACAGUCA                     | -11.9028                               | 263                            | -8.3703                         | 13487                   |
| ACGGCGG                     | -9.3178                                | 257                            | -10.6111                        | 15167                   |
| ACGGUGG                     | -9.3178                                | 257                            | -11.2399                        | 15379                   |
| CGAACAG                     | -5.581                                 | 222                            | -4.3369                         | 7275                    |
| GUCUUGA                     | -4.5811                                | 208                            | -3.109                          | 5299                    |
| UGAGUAG                     | -3.5811                                | 193                            | -3.3012                         | 5575                    |
| <b>High Frequency</b>       |                                        |                                |                                 |                         |
|                             |                                        | <b>Frequency Rank</b>          |                                 | <b>Frequency Rank</b>   |
| UGCUGAC                     | 7.0623                                 | 1                              | 7.4922                          | 1                       |
| UCCUGAC                     | 6.0623                                 | 2                              | 6.4198                          | 2                       |
| <u>CACUGAC</u>              | 7.2322                                 | 3                              | 6.7525                          | 3                       |
| CAGUGAC                     | 5.8173                                 | 5                              | 3.1993                          | 61*                     |
| <u>UACUAAU</u>              | 7.4953                                 | 6                              | 7.4166                          | 15                      |
| UUCUAAC                     | 6.3254                                 | 7                              | 6.6091                          | 13                      |
| UAUUAAC                     | 6.4953                                 | 8                              | 5.7244                          | 17                      |
| UACUGAU                     | 7.2322                                 | 10                             | 6.7148                          | 18                      |
| <u>UGCUAAC</u>              | 7.3254                                 | 11                             | 8.194                           | 19                      |
| UAAUAAC                     | 6.4953                                 | 12                             | 6.9698                          | 20                      |
| UACUAAA                     | 6.4953                                 | 13                             | 7.0303                          | 27                      |
| GGCUGAC                     | 5.0624                                 | 38*                            | 6.3238                          | 6                       |
| UGCUGAU                     | 5.0624                                 | 54*                            | 5.5033                          | 11                      |
| <b>Unique Point Mutants</b> |                                        |                                |                                 |                         |
|                             |                                        | <b>Score Rank</b>              |                                 | <b>Score Rank</b>       |
| UACUUAC                     | 6.9103                                 | 9                              | 6.9341                          | 15                      |
| UACUCAC                     | 6.9103                                 | 9                              | 7.5629                          | 5                       |
| AACUAAC                     | 6.4953                                 | 10                             | 7.3598                          | 10                      |
| UCCUAAC                     | 6.3254                                 | 11                             | 7.1216                          | 11                      |
| UACUACC                     | 6.1734                                 | 13                             | 6.2725                          | 27                      |
| UACUAUC                     | 6.1734                                 | 13                             | 4.7287                          | 97                      |
| UACCAAC                     | 6.1734                                 | 13                             | 5.1896                          | 63                      |
| UACAAAC                     | 6.1734                                 | 13                             | 6.6613                          | 18                      |
| UACUAGC                     | 6.1734                                 | 13                             | 5.7024                          | 45                      |
| UACGAAC                     | 6.1734                                 | 13                             | 6.3746                          | 23                      |

| <b><u>Disease BPS</u></b> |         | <b><u>Score Rank</u></b> |        | <b><u>Score Rank</u></b> |
|---------------------------|---------|--------------------------|--------|--------------------------|
| <b><u>TH</u></b>          |         |                          |        |                          |
| GGCUGAU                   | 3.0625  | 51                       | 4.3349 | 138                      |
| GGCAGAU                   | -0.2593 | 119                      | 1.5907 | 782                      |
| <b><u>LCAT</u></b>        |         |                          |        |                          |
| CCCUGAC                   | 4.0624  | 36                       | 4.4686 | 124                      |
| CCCCGAC                   | 0.7406  | 97                       | 0.2527 | 1533                     |
| <b><u>ITGB4</u></b>       |         |                          |        |                          |
| GGCUCAC                   | 2.7406  | 60                       | 5.183  | 65                       |
| GGCACAC                   | -0.5811 | 129                      | 2.4388 | 482                      |
| <b><u>COL5A1</u></b>      |         |                          |        |                          |
| GACUGAU                   | 5.2323  | 22                       | 5.5464 | 50                       |
| GACGGAU                   | 1.9105  | 74                       | 2.5155 | 464                      |

**Supplementary Table 3 – Intronic regions selected for Tat-hybrid intron context SF1 binding assay**

| Gene                       | Intron | SF1 Affinity Model BPS | SF1 Affinity Model Score (bits) | Literature BPS Model BPS | Literature BPS Model Score (bits) | PPT Sequence | PPT Score (bits) | SF1 Affinity Model BP A - PPT Distance |
|----------------------------|--------|------------------------|---------------------------------|--------------------------|-----------------------------------|--------------|------------------|----------------------------------------|
| <b>High BPS - High PPT</b> |        |                        |                                 |                          |                                   |              |                  |                                        |
| <i>CUL4B</i>               | 10     | UACUAAC                | 14.220                          | UACUAAC                  | 5.207                             | UUUUUUUCCCUU | 14.499           | 7                                      |
| <i>TPK1</i>                | 8      | UACUAAU                | 13.287                          | UACUAAU                  | 4.943                             | UUUUUUUCCCUU | 15.236           | 5                                      |
| <i>NUP133</i>              | 18     | UGCUAAC                | 11.931                          | UGCUAAC                  | 5.621                             | UUUUUUUCCCAU | 13.166           | 6                                      |
| <i>PSMD7</i>               | 2      | AACUAAC                | 10.832                          | AACUAAC                  | 4.792                             | UUUUUUUCCUC  | 13.138           | 2                                      |
| <i>DTX2</i>                | 4      | GACUAAC                | 10.762                          | GACUAAC                  | 5.207                             | UUGUUUUCCCUU | 11.799           | 4                                      |
| <i>RNF41</i>               | 3      | UACUGAC                | 8.704                           | UACUGAC                  | 5.470                             | UUUUUUUCCUG  | 12.330           | 5                                      |
| <i>STK11</i>               | 6      | GACUGAC                | 7.535                           | GACUGAC                  | 5.470                             | UUUCUCCUC    | 13.488           | 8                                      |
| <i>DOK5</i>                | 6      | UGCUGAC                | 7.492                           | UGCUGAC                  | 5.885                             | UUUCUCCCUU   | 14.849           | 9                                      |
| <i>HINT3</i>               | 1      | CACUAAC                | 7.454                           | CACUAAC                  | 4.792                             | GUUUUUUCCCUU | 12.848           | 6                                      |
| <i>ANKRD13C</i>            | 10     | UCCUAAC                | 7.122                           | UCCUAAC                  | 5.621                             | UUUUUUUCCUC  | 13.138           | 4                                      |
| <b>Low BPS - Low PPT</b>   |        |                        |                                 |                          |                                   |              |                  |                                        |
| <i>TLL10</i>               | 10     | GGCUCAG                | 1.626                           | UCCUGGU                  | 2.162                             | GCUCUCUGCAG  | -0.717           | 7                                      |
| <i>HPCAL4</i>              | 2      | GGCUGUC                | 1.647                           | CCCUGAG                  | 2.885                             | CUGCGCCCAA   | 0.784            | 3                                      |
| <i>LHX3</i>                | 6      | AGCUCAA                | 1.931                           | GCUCAU                   | 2.773                             | UCUAAGCCCUU  | 0.961            | 5                                      |
| <i>YL01_HUMAN</i>          | 3      | CGCUGAG                | 1.984                           | AGCUGAG                  | 2.885                             | UCUCGUUUUUG  | 1.023            | 9                                      |
| <i>STCBP2</i>              | 4      | GAGUGAU                | 1.993                           | GAGUGAU                  | 3.622                             | CACCUUCCCA   | 0.907            | 3                                      |
| <b>Low BPS - High PPT</b>  |        |                        |                                 |                          |                                   |              |                  |                                        |
| <i>CECR1</i>               | 1      | UCUUCAC                | 1.598                           | UCUUCAC                  | 3.037                             | CUUCUCCUC    | 11.029           | 6                                      |
| <i>TAP2</i>                | 6      | GCCUCAU                | 2.122                           | GCCUCAU                  | 3.037                             | UUUCUUCUCCU  | 10.025           | 5                                      |
| <i>IQCC</i>                | 1      | UGAUUAG                | 2.201                           | CCGUGAU                  | 3.622                             | CUUCUUCUCCUC | 10.292           | 5                                      |
| <i>MOCS1</i>               | 10     | GACUUAG                | 2.209                           | UCUUCAU                  | 2.773                             | UUUCUUCUCU   | 12.417           | 4                                      |
| <i>JTB</i>                 | 1      | UUUUGAC                | 2.226                           | UUUUGAC                  | 5.207                             | UUUUGUCCCUU  | 12.362           | 2                                      |
| <i>MLC1</i>                | 9      | UGCAACC                | 2.317                           | CCCUGGC                  | 2.010                             | UUUUUUUCCAG  | 10.260           | 7                                      |
| <i>CJ053_HUMAN</i>         | 2      | UGCUGCU                | 2.370                           | UCUUGAU                  | 5.358                             | UUUCUUCUCUG  | 10.248           | 1                                      |
| <i>NFXL1</i>               | 2      | UGCAGAA                | 2.373                           | AGGUGAC                  | 3.885                             | UUUUUUUUUU   | 9.997            | 9                                      |
| <i>MTA2</i>                | 7      | UUCUCAA                | 2.391                           | UUUUGAC                  | 5.207                             | AUUUCUCCCUU  | 10.318           | 1                                      |
| <i>NP_077018.1</i>         | 8      | CGCUGCC                | 2.408                           | GGUUUAC                  | 4.037                             | CUUCUUCUCCU  | 12.390           | 9                                      |

**Supplementary Table 4 - Affinity data for profile models**

**A**

| Sequence | Interim SF1 Affinity |
|----------|----------------------|
| UACUAAU  | 117.9                |
| CACUAAC  | 111.2                |
| UAUUAAC  | 104.7                |
| UAAUAAC  | 102.7                |
| UACUAAC  | 100                  |
| GGCUGAC  | 81.2                 |
| GGCUGAC  | 76.3                 |
| UACUCAC  | 75.4                 |
| UACUAAA  | 74.4                 |
| UACUUAC  | 74.1                 |
| CACUGAC  | 71                   |
| UAGUAAC  | 69.5                 |
| UGCUGAC  | 66.8                 |
| UACUGAC  | 58.7                 |
| UUCUAAC  | 57.1                 |
| UCCUGAC  | 52.9                 |
| UACCAAC  | 43.7                 |
| UACGAAC  | 42.4                 |
| UACUAUC  | 41.6                 |
| UACUAAG  | 38.9                 |
| CAGUGAC  | 38.4                 |
| UACUACC  | 36.7                 |
| UGCUGAU  | 15                   |

**B**

| Sequence | SF1 Affinity |
|----------|--------------|
| UAAUAAC  | 151.61       |
| GGCUGAC  | 116.09       |
| UGCUAAC  | 110.56       |
| CACUAAC  | 105.11       |
| UACUAAC  | 100          |
| UACUAAU  | 95.02        |
| AACUAAC  | 92.17        |
| GACUAAC  | 83.17        |
| AUAACCA  | 82.6         |
| UACUAAA  | 73.22        |
| UAUUAAC  | 70.45        |
| CACUGAC  | 68.23        |
| GACGGAU  | 68.1         |
| UGCUGAU  | 67.87        |
| UGCUGAC  | 60.35        |
| GGCUCAC  | 59.34        |
| GUCUUGA  | 54.89        |
| CCCUGAC  | 53.89        |
| UACUGAC  | 52.83        |
| UACUUAC  | 49.66        |
| GGCACAC  | 47.55        |
| UACUCAC  | 47.49        |
| GGCUGAU  | 46.64        |
| UCCUAAC  | 46.52        |
| UAGUAAC  | 42.85        |
| UACUACC  | 40.98        |
| GGCAGAU  | 38.03        |
| ACAGUCA  | 36.94        |
| UACGAAC  | 36.29        |
| UACUGAU  | 31.3         |
| GACUGAU  | 31.13        |
| UACUAUC  | 30.91        |
| UACCAAC  | 29.95        |
| ACUACCA  | 28.69        |
| UACUAAG  | 27.32        |
| CAGUGAC  | 26.33        |
| UACAAAC  | 26.16        |
| UCCUGAC  | 25.97        |
| UACUAGC  | 24.36        |
| CCCCGAC  | 23.86        |
| UUCUAAC  | 21.19        |
| CGAACAG  | 17.74        |
| ACGGUGG  | 17.45        |
| UGAGUAG  | 15.72        |
| ACGGCGG  | 15.32        |
| UAGUGAC  | 12.27        |

**Supplementary Table 5 – Fractional agreement between predicted and experimentally validated BPSs**

|                             | <b>Initial SF1 Binding</b> | <b>SF1 Affinity</b> | <b>YNCURAY</b> | <b>Literature BPS</b> | <b>Pentamer BPS</b> |
|-----------------------------|----------------------------|---------------------|----------------|-----------------------|---------------------|
| <b>Intronic region</b>      | 0.065                      | 0.068               | 0.286          | 0.024                 | 0.099               |
| <b>Expected BPS region</b>  | 0.286                      | 0.357               | 0.200          | 0.176                 | 0.286               |
| <b>Gao et al. BPS range</b> | 0.235                      | 0.357               | 0.158          | 0.182                 | 0.241               |

# Supplementary Figure 1

## Sequence Logo of U2AF65 High Affinity Sequences

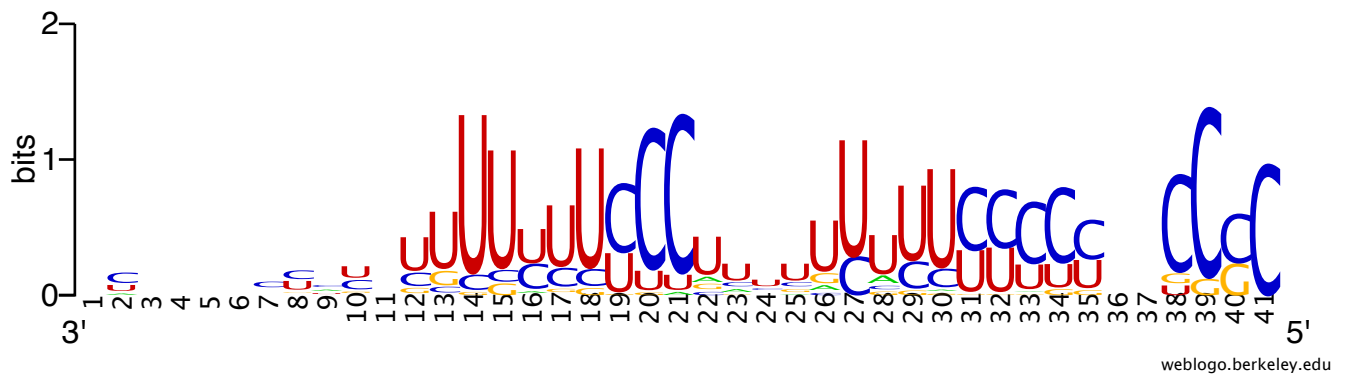

### **Supplementary Table 1 – Introns selected for branch point mapping**

BPS and PPT criteria for selecting introns for branch point mapping are described in Methods. Gene lists are HUGO gene identifiers (1); bit scores are from the U2AF65 Affinity Model and Initial SF1 Binding Model; BP A-PPT Distance lists the number of nucleotides from the predicted BP A to the start of the predicted PPT; Intron lists the number of each intron selected from each gene.

### **Supplementary Table 2 – Sequences assayed for SF1 binding**

Sequences are grouped according to selection criteria described in Methods. ‘Score Rank’ is the rank of the bit score for a sequence relative to all unique BPS scores generated by a model. ‘Frequency Rank’ represents the ranking of a sequence based on how frequently that sequence occurs in an expected BP A region, with or without a score threshold, within the set of matches from 109,455 introns for the Initial SF1 Binding Model or 117,499 introns for the SF1 Affinity Model. Note that two overlapping sets of intronic regions were used in model construction: The first set required 100% identity between the exon downstream of the intron and its genomic locus and <100% sequence identity between every pair of introns, yielding 109,455 non-redundant intronic regions. The second set required  $\geq 99\%$  identity between the exon downstream of the intron and the genomic locus and no sequence uniqueness, yielding 148,643 intronic regions, including some with 3’ splice site reuse in different mRNA isoforms. A nonredundant subset of this second set consisting of 117,499 sequences, with <100% sequence identity between every pair of sequences, was used to evaluate models while the full second set was used to construct the annotated dataset of intronic regions. ‘Highest Scoring’ lists the 10 highest scoring sequences; for the Initial SF1 Binding Model there were 4 sequences with the 7<sup>th</sup> highest score 7.2322 and only one of these was selected. ‘High Frequency’ lists frequently observed sequences ranked using all profile model matches in the expected BPS region above a score threshold (or in the absence of a score threshold for ranks marked with ‘\*’) (see Methods). Sequences overlapping between the ‘Highest Scoring’ and ‘High Frequency’ categories are underlined. ‘Low Scoring’ are the 8 selected low scoring sequences. ‘Unique Point Mutants’ are 10 UACUAAC point mutants assayed for binding that do not overlap with any other already selected sequences. ‘Disease BPS’ lists 4 wild-type and mutant sequences where BPS mutations have been implicated in disease: *TH* – tyrosine hydroxylase; *LCAT* – lecithin cholesterol acetyltransferase; *ITGB4* – integrin beta-4; *COL5A1* – collagen 5A1.

### **Supplementary Table 3 – Intronic regions selected for Tat-hybrid intron context SF1 binding assays**

Intronic regions were selected for Tat-hybrid assays with the SF1 Affinity Model and U2AF65 Affinity Model using criteria described in Methods. Intronic regions are grouped by high BPS and high PPT scores (High BPS - High PPT), low BPS and high PPT scores (Low BPS - High PPT), or low BPS and low PPT scores (Low BPS - Low PPT). Gene and intron definitions are as in Supplementary Table 1. The listed BPS scores are from the SF1 Affinity Model and Literature BPS Model.

### **Supplementary Table 4 - Affinity data for profile models**

The two sets of affinity values from SF1 binding assays as used for profile model construction. Affinity values are expressed as percent activation relative to UACUAAC. This data corresponds to the weights used for constructing the two affinity-weighted BPS models: interim SF1 Affinity Model (A) and SF1 Affinity Model (B).



### **Supplementary Table 5 - Fractional agreement between predicted and experimentally validated BPSs**

The fraction of correct predictions made using BPS profile models using the same thresholds as used for constructing the models, in comparison with BPSs experimentally validated by Gao et al. (2). BPS predictions were made within the entire -199 to -1 'Intronic Region', the -46 to -16 'Expected BPS Region,' as well as the -63 to -3 region in which all reported BPSs were identified by Gao et al. ('Gao et al. BPS Range').

### **Supplementary Figure 1 - Sequence Logo of U2AF65 High Affinity Sequences**

The sequence logo constructed using a manually edited multiple alignment of high affinity U2AF65 sequences identified by SELEX (3). The logo suggested a dimeric motif with each monomer having similar information content. Therefore only the 3' half of this putative dimeric motif, representing positions 13 to 23 of the alignment, was used for constructing the U2AF65 Affinity Model.

### **SUPPLEMENTARY REFERENCES:**

1. Eyre, T.A., Ducluzeau, F., Sneddon, T.P., Povey, S., Bruford, E.A. and Lush, M.J. (2006) The HUGO Gene Nomenclature Database, 2006 updates. *Nucleic Acids Res*, **34**, D319-321.
2. Gao, K., Masuda, A., Matsuura, T. and Ohno, K. (2008) Human branch point consensus sequence is yUnAy. *Nucleic Acids Res*, **36**, 2257-2267.
3. Singh, R., Valcarcel, J. and Green, M.R. (1995) Distinct binding specificities and functions of higher eukaryotic polypyrimidine tract-binding proteins. *Science*, **268**, 1173-1176.
